# Supplementary material for: Helicobacter pylori infection, serum pepsinogens as markers of atrophic gastritis, and leukocyte telomere length: a population-based study
Source: PubMed Central journal article supplement (PMC6647065; doi:10.1186/s40246-019-0217-3), 2019-07-22
Supplement: 40246_2019_217_MOESM1_ESM.pdf [file 40246_2019_217_MOESM1_ESM.pdf]

**Additional file 1: Mean leukocyte telomere length (kb) according to sociodemographic and lifestyle factors, stratified by sex**

|                                           | Men   |             |                          |         | Women |             |                          |         | p for interaction by sex |
|-------------------------------------------|-------|-------------|--------------------------|---------|-------|-------------|--------------------------|---------|--------------------------|
|                                           | Total | Mean (SD)   | Mean difference (95% CI) | p value | Total | Mean (SD)   | Mean difference (95% CI) | p value |                          |
| <b>Age, years</b>                         | df=4  |             |                          | <0.001* | df=4  |             |                          | <0.001* | 0.12                     |
| 27-34                                     | 71    | 7.14 (0.55) | Reference                |         | 56    | 7.24 (0.54) | Reference                |         |                          |
| 35-44                                     | 97    | 7.06 (0.52) | -0.08 (-0.30, 0.20)      |         | 94    | 6.94 (0.56) | -0.30 (-0.56, -0.04)     |         |                          |
| 45-54                                     | 110   | 6.73 (0.57) | -0.41 (-0.66, -0.19)     |         | 95    | 6.88 (0.52) | -0.36 (-0.62, -0.10)     |         |                          |
| 55-64                                     | 100   | 6.57 (0.55) | -0.57 (-0.82, -0.33)     |         | 95    | 6.67 (0.57) | -0.57 (-0.83, 0.31)      |         |                          |
| 65-78                                     | 118   | 6.35 (0.56) | -0.79 (-1.03, -0.56)     |         | 98    | 6.47 (0.53) | -0.77 (-1.03, -0.50)     |         |                          |
| <b>Education</b>                          | df=2  |             |                          | 0.3**   | df=2  |             |                          | 0.001** | 0.2                      |
| Did not complete high school              | 291   | 6.70 (0.60) | Reference                |         | 307   | 6.74 (0.56) | Reference                |         |                          |
| Completed high school                     | 118   | 6.77 (0.59) | 0.07 (-0.10, 0.23)       |         | 92    | 6.92 (0.64) | 0.18 (0.01, 0.35)        |         |                          |
| Academic education                        | 86    | 6.80 (0.73) | 0.10 (-0.08, 0.28)       |         | 38    | 7.03 (0.64) | 0.29 (0.05, 0.54)        |         |                          |
| <b>Number of siblings</b>                 | df=2  |             |                          | 0.3***  | df=2  |             |                          | 0.3***  | 0.7                      |
| 0-3                                       | 45    | 6.66 (0.63) | Reference                |         | 42    | 6.68 (0.59) | Reference                |         |                          |
| 4-7                                       | 222   | 6.71 (0.63) | 0.05 (-0.20, 0.30)       |         | 201   | 6.81 (0.63) | 0.13 (-0.12, 0.36)       |         |                          |
| ≥8                                        | 228   | 6.77 (0.62) | 0.11 (-0.14, 0.35)       |         | 195   | 6.82 (0.55) | 0.14 (-0.10, 0.38)       |         |                          |
| <b>Religiosity</b>                        |       |             |                          | 0.003   |       |             |                          | 0.017   | 0.6                      |
| Religious                                 | 161   | 6.61 (0.61) | -0.18 (-0.3, -0.06)      |         | 189   | 6.73 (0.62) | -0.13 (-0.25, -0.02)     |         |                          |
| Traditional/secular                       | 334   | 6.79 (0.62) | Reference                |         | 246   | 6.86 (0.57) | Reference                |         |                          |
| <b>Marital status</b> ****                |       |             |                          | 0.3     |       |             |                          | <0.001  | 0.009                    |
| Married                                   | 467   | 6.72 (0.63) | -0.11 (-0.35, 0.12)      |         | 297   | 6.88 (0.59) | 0.24 (0.11, 0.35)        |         |                          |
| Not married                               | 29    | 6.83 (0.54) | Reference                |         | 139   | 6.64 (0.57) | Reference                |         |                          |
| <b>Smoking</b>                            |       |             |                          | 0.2     |       |             |                          | 0.6     | 0.8                      |
| ≥1 cigarettes/ day                        | 202   | 6.77 (0.58) | 0.07 (-0.05, 0.18)       |         | 39    | 6.84 (0.63) | 0.05 (-0.15, 0.24)       |         |                          |
| No smoking/other                          | 293   | 6.70 (0.66) | Reference                |         | 394   | 6.80 (0.59) | Reference                |         |                          |
| <b>Obesity</b>                            |       |             |                          | 0.10    |       |             |                          | 0.018   | 0.6                      |
| BMI <30 kg/m <sup>2</sup>                 | 338   | 6.76 (0.63) | 0.10 (-0.02, 0.20)       |         | 184   | 6.88 (0.58) | 0.14 (0.02, 0.25)        |         |                          |
| BMI ≥30 kg/m <sup>2</sup>                 | 158   | 6.66 (0.61) | Reference                |         | 254   | 6.74 (0.60) | Reference                |         |                          |
| <b>Sufficient physical activity level</b> |       |             |                          | 0.17    |       |             |                          | <0.001  | 0.07                     |
| No                                        | 68    | 6.63 (0.65) | -0.11 (-0.27, 0.05)      |         | 112   | 6.58 (0.56) | -0.29 (-0.41, -0.16)     |         |                          |
| Yes                                       | 428   | 6.74 (0.62) | Reference                |         | 326   | 6.87 (0.58) | Reference                |         |                          |

|                                     |     |             |                      |       |     |             |                      |        |      |
|-------------------------------------|-----|-------------|----------------------|-------|-----|-------------|----------------------|--------|------|
| <b>High physical activity level</b> |     |             |                      | 0.035 |     |             |                      | <0.001 | 0.14 |
| No                                  | 111 | 6.62 (0.63) | -0.14 (-0.27, -0.01) |       | 154 | 6.63 (0.59) | -0.27 (-0.39, -0.16) |        |      |
| Yes                                 | 385 | 6.76 (0.62) | Reference            |       | 284 | 6.90 (0.57) | Reference            |        |      |

BMI: body mass index; CI: confidence intervals; df: degrees of freedom; kb: kilo base pairs; kg: kilogram; m: meters;

\* ANOVA for the difference between the groups. Bonferroni test in men 27-34 vs. 35-44 (p=1.0), p<0.01 for all other pairwise comparisons. Bonferroni test in women 27-34 vs. 35-44 (p=0.013), 27-34 vs. 45-54 (p=0.001), 35-44 vs. 45-54 (p=1.0), 35-44 vs. 55-64 (p=0.007), 45-54 vs. 55-64 (p=0.10), 65-78 vs. 55-64 (p=0.095), p<0.001 for all other pairwise comparisons.

\*\* ANOVA for the difference between the groups. Bonferroni test in men: p>0.5 for all pairwise comparisons. Bonferroni test in women: Did not complete high school vs. completed high school (p=0.028). Did not complete high school vs. academic education (p=0.011) Completed high school vs. academic education (p=0.9).

\*\*\* ANOVA for the differences between the groups. Bonferroni test p>0.8 and p>0.4 for all pairwise comparisons in men and women, respectively.

\*\*\*\* Not married included persons who reported being single, widowed or divorced
