# Supplementary material for: Helicobacter pylori infection, serum pepsinogens as markers of atrophic gastritis, and leukocyte telomere length: a population-based study
Source: PubMed Central journal article supplement (PMC6647065; doi:10.1186/s40246-019-0217-3), 2019-07-22
Supplement: 40246_2019_217_MOESM2_ESM.pdf [file 40246_2019_217_MOESM2_ESM.pdf]

**Additional file 2: Multiple linear regression model of adjusted associations of demographic and lifestyle factors, *H. pylori* sero-status and serological evidence of atrophic gastritis, with leukocyte telomere length (kb)**

|                                                                             | Beta coefficient<br>(95% CI) | p value |
|-----------------------------------------------------------------------------|------------------------------|---------|
| <b>Sex</b>                                                                  |                              |         |
| Males                                                                       | -0.10 (-0.18, -0.01)         | 0.02    |
| Females                                                                     | Reference                    |         |
| <b>Age, years</b>                                                           |                              |         |
| 25-34                                                                       | Reference                    |         |
| 35-44                                                                       | -0.18 (-0.30, -0.05)         | 0.006   |
| 45-54                                                                       | -0.38 (-0.51, -0.26)         | <0.001  |
| 55-64                                                                       | -0.56 (-0.68, -0.43)         | <0.001  |
| 65-78                                                                       | -0.75 (-0.88, -0.62)         | <0.001  |
| <b>Religiosity</b>                                                          |                              |         |
| Religious                                                                   | -0.06 (-0.14, 0.02)          | 0.12    |
| Traditional/secular                                                         | Reference                    |         |
| <b><i>H. pylori</i> sero-status/atrophic gastritis *</b>                    |                              |         |
| <i>H. pylori</i> negative, no atrophic gastritis                            | Reference                    |         |
| <i>H. pylori</i> positive, no atrophic gastritis                            | 0.07 (-0.05, 0.18)           | 0.2     |
| <i>H. pylori</i> positive plus atrophic gastritis                           | 0.18 (-0.02, 0.37)           | 0.08    |
| Past <i>H. pylori</i> infection (IgG sero-negative) plus atrophic gastritis | -0.19 (-0.40, 0.01)          | 0.06    |
| <b>Marital status</b>                                                       |                              |         |
| Married                                                                     | Reference                    |         |
| Not married                                                                 | -0.01 (-0.11, 0.10)          | 0.8     |
| <b>Education</b>                                                            |                              |         |
| Did not complete high school                                                | Reference                    |         |
| Completed high school                                                       | -0.01 (-0.10, 0.08)          | 0.7     |
| Academic education                                                          | 0.06 (-0.05, 0.18)           | 0.2     |
| <b>Smoking</b>                                                              |                              |         |
| Regular smoking $\geq 1$ cigarette/ day                                     | 0.02 (-0.07, 0.11)           | 0.7     |
| Other                                                                       | Reference                    |         |
| <b>Obesity</b>                                                              |                              |         |
| BMI <30 kg/m <sup>2</sup>                                                   | Reference                    |         |
| BMI $\geq 30$ kg/m <sup>2</sup>                                             | -0.02 (-0.09, 0.06)          | 0.7     |
| <b>High physical activity level</b>                                         |                              |         |
| No                                                                          | Reference                    |         |
| Yes                                                                         | 0.03 (-0.06, 0.11)           | 0.5     |
| <b>Number of siblings</b>                                                   |                              |         |
| 0-3                                                                         | Reference                    |         |
| 4-7                                                                         | -0.03 (-0.16, 0.10)          | 0.6     |
| $\geq 8$                                                                    | -0.05 (-0.19, 0.08)          | 0.4     |

BMI: body mass index; CI: confidence intervals; IgG: immunoglobulin; kb: kilo base pairs; kg: kilogram; m: meters;

\* Atrophic gastritis was defined as serum pepsinogen (PG) I <30  $\mu$ g/L or PGI: PGII <3.0.

Model summary: adjusted R<sup>2</sup> = 0.193, degrees of freedom=17, (F statistic =13.86), p<0.001. Adjusted for the variables in the model.
