# Supplementary material for: Helicobacter pylori infection, serum pepsinogens as markers of atrophic gastritis, and leukocyte telomere length: a population-based study
Source: PubMed Central journal article supplement (PMC6647065; doi:10.1186/s40246-019-0217-3), 2019-07-22
Supplement: 40246_2019_217_MOESM3_ESM.pdf [file 40246_2019_217_MOESM3_ESM.pdf]

**Additional file 3: Self-reported religiosity by age group**

| Age groups, years | Total | Self-reported religiosity, n (%) |
|-------------------|-------|----------------------------------|
| 27-34             | 123   | 39 (31.0%)                       |
| 35-44             | 189   | 56 (29.6%)                       |
| 45-54             | 205   | 62 (30.2%)                       |
| 55-64             | 195   | 84 (43.1%)                       |
| 65-78             | 215   | 109 (50.7%)                      |
